# Supplementary material for: Comparison of RO tropopause height based on different tropopause determination methods
Source: Copernicus journal article supplement (doi:10.5194/amt-2019-379), 2019-10-30
Supplement: Supplementary file [file amt-2019-379-AC1-supplement.zip]

# EDITORIAL CERTIFICATE

This document certifies that the manuscript listed below was edited for proper English language, grammar, punctuation, spelling, and overall style by one or more of the highly qualified native English speaking editors at EditSprings.

## Manuscript title:

Comparison of RO tropopause height based on different tropopause determination methods

## Authors:

Ziyan Liu, Weihua Bai\*, Yueqiang Sun\*, Junming Xia, Guangyuan Tan, Cheng Cheng, Qifei Du, Xianyi Wang, Danyang Zhao, Yusen Tian, Xiangguang Meng, Congliang Liu, Yuerong Cai, Dongwei Wang

## Date Issued:

Dec 31 2019

## Certificate Number:

ES-201912171511743920

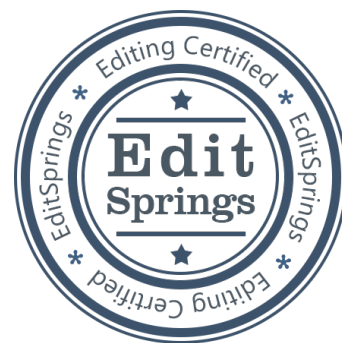

This certificate can be verified on [www.editsprings.com/query.asp](http://www.editsprings.com/query.asp). This document certifies that the manuscript listed above was edited for proper English language, grammar, punctuation, spelling, and overall style by one or more of the highly qualified native English speaking editors at EditSprings. Neither the research content nor the authors' intentions were altered in any way during the editing process. Documents receiving this certification should be English-ready for publication; however, the author has the ability to accept or reject our suggestions and changes.

EditSprings provides a range of editing, translation and manuscript services for researchers and publishers around the world. Our top-quality PhD editors are all native English speakers from famous institutions cross the U.S., Britain, Canada and so on. Our editors come from nearly every research field and possess the highest qualifications to edit research manuscripts written by non-native English speakers.
